# Supplementary material
Source: PubMed Central journal article supplement (PMC2154418)

**a**

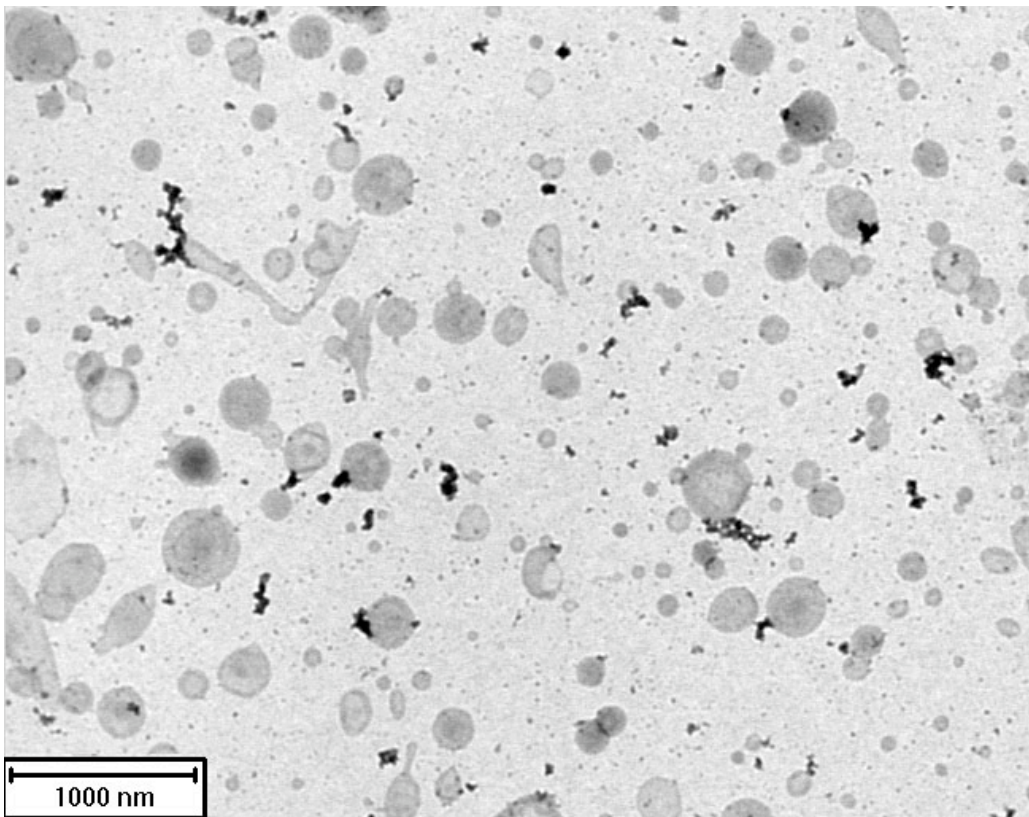

**b**

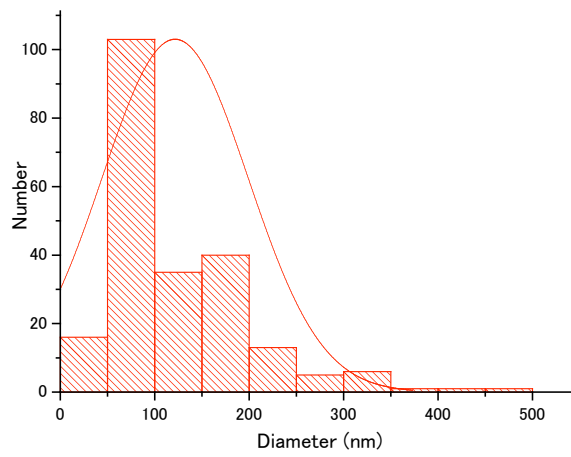

**c**

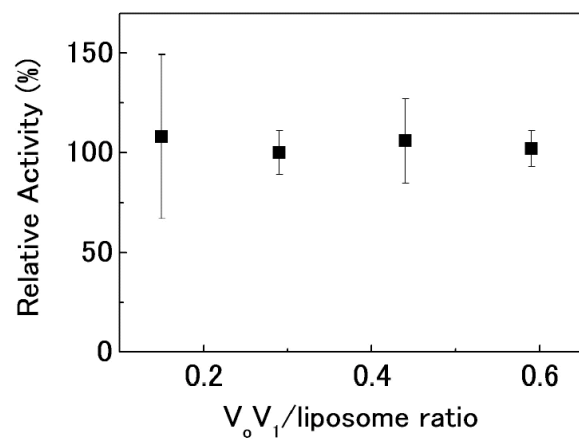

Supplement: supp_0706914105_06914Fig5.pdf [file supp_0706914105_06914Fig5.pdf]

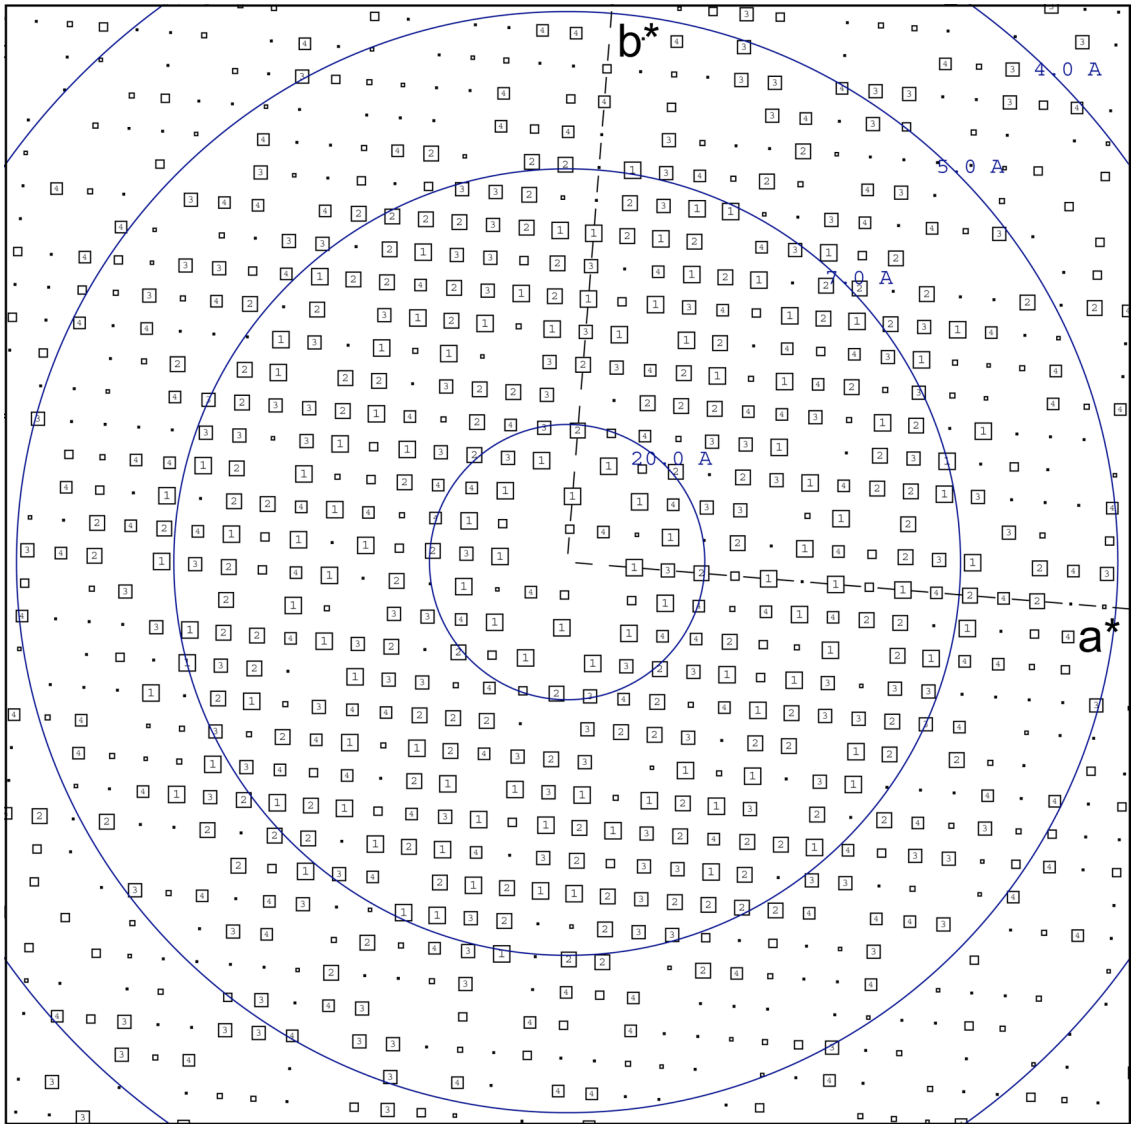

Supplement: supp_0706914105_06914Fig6.pdf [file supp_0706914105_06914Fig6.pdf]
